# Supplementary material for: Improved Wound Healing by Naringin Associated with MMP and the VEGF Pathway
Source: MDPI journal article supplement (doi:10.3390/molecules27051695), 2022-03-04
Supplement: s1 [file s1]

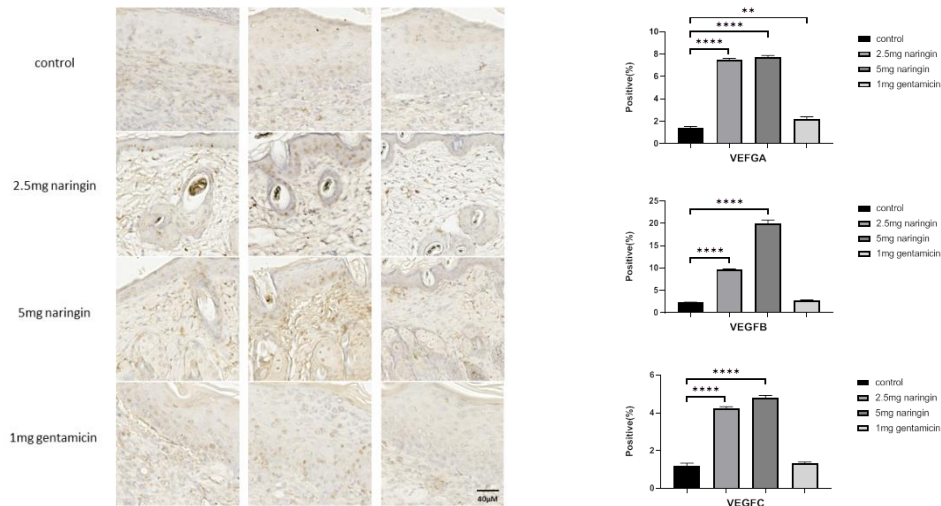

**Supplementary Figure S1.** IHC evaluation of VEGFA, B and C. Wound sections were evaluated on day 7 by staining with anti- VEGFA, B and C antibodies. Scale bar = 40  $\mu$ m. The expressions of VEGFA, VEGFB and VEGFC were all increased in the skin wound tissues.

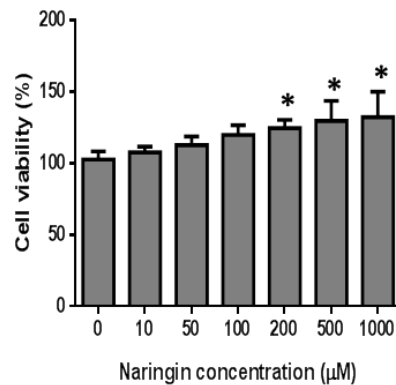

**Supplementary Figure S2.** A cell proliferation assay (CCK-8) demonstrated that naringin didn't affect HaCaT cell proliferation with 24 hour treatment.
